# Supplementary material
Source: PubMed Central journal article supplement (PMC7397109)
Supplement: supp_RA120.013711_159906_3_supp_537735_qb03w6.pdf [file supp_RA120.013711_159906_3_supp_537735_qb03w6.pdf]

Supporting Information for

**Diabetes enhances translation of *Cd40* mRNA in murine retinal Müller glia via a 4E-BP1/2-dependent mechanism**

Sadie K. Dierschke, Allyson L. Toro, William P. Miller, Siddharth Sunilkumar,  
and Michael D. Dennis\*

\*Corresponding author. Email: [mdennis@psu.edu](mailto:mdennis@psu.edu)

**The PDF file includes:**

Fig S1. Working model for potential mechanism whereby diabetes-induced O-GlcNAcylation enhances retinal inflammation via upregulated *Cd40* mRNA translation.

Table S1. Main and Interaction Effects from Two-Way ANOVA

## Figure S1

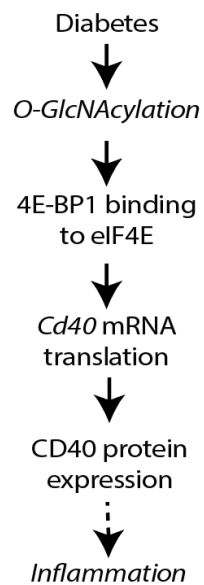

**Fig S1. Working model for potential mechanism whereby diabetes-induced O-GlcNAcylation enhances retinal inflammation via upregulated *Cd40* mRNA translation.** The findings here are consistent with a working model wherein diabetes-induced O-GlcNAcylation of 4E-BP1 promotes retinal inflammation by enhancing the translation of the *Cd40* mRNA in Müller glia.

**Table S1. Main and Interaction Effects from Two-Way ANOVA**

**P value**

|               | <b>Interaction</b> | <b>TMG</b> | <b>Genotype</b> |
|---------------|--------------------|------------|-----------------|
| <i>Fig 4F</i> | 0.0007             | 0.0003     | 0.0185          |

|               | <b>Interaction</b> | <b>Diabetes</b> | <b>Genotype</b> |
|---------------|--------------------|-----------------|-----------------|
| <i>Fig 5C</i> | 0.7642             | 0.972           | 0.771           |
| <i>Fig 5D</i> | 0.2656             | 0.0287          | 0.0538          |
| <i>Fig 5E</i> | 0.0235             | 0.0387          | 0.0027          |
| <i>Fig 5F</i> | 0.0188             | 0.0117          | 0.0062          |
